# Supplementary material for: Clinical Relevance and Suppressive Capacity of Human Myeloid-Derived Suppressor Cell Subsets
Source: Oxford University Press journal article supplement (doi:10.1158/1078-0432.ccr-17-3726), 2018-06-18
Supplement: 10780432ccr173726-sup-194034_3_supp_4787952_p9hd1q.pdf [file 10780432ccr173726-sup-194034_3_supp_4787952_p9hd1q.pdf]

Supplementary Material for  
CLINICAL RELEVANCE AND SUPPRESSIVE CAPACITY OF HUMAN MDSC SUBSETS

Supplementary Methods:

Upregulation of maturation markers on immature PMN-MDSC

PMN-MDSC subsets were stained and sorted according to the expression of CD11b and CD16. Sorted CD11b<sup>+</sup>/CD16<sup>+</sup> cells were cultured in 96 well round bottom plates in RPMI 1640 medium (Thermo Fisher scientific, Karlsruhe, Germany) supplemented with 10% (v/v) heat-inactivated FCS, 100 IU/ml penicillin, and 100 mg/ml streptomycin (Thermo Fisher Scientific) in the presence of 40ng/mL G-CSF (Granocyte 34, CHUGAI PHARMA, Frankfurt/Main, Germany). Medium was exchanged every 2-3 days and cells were stained on day 7 for expression of CD11b and CD16.

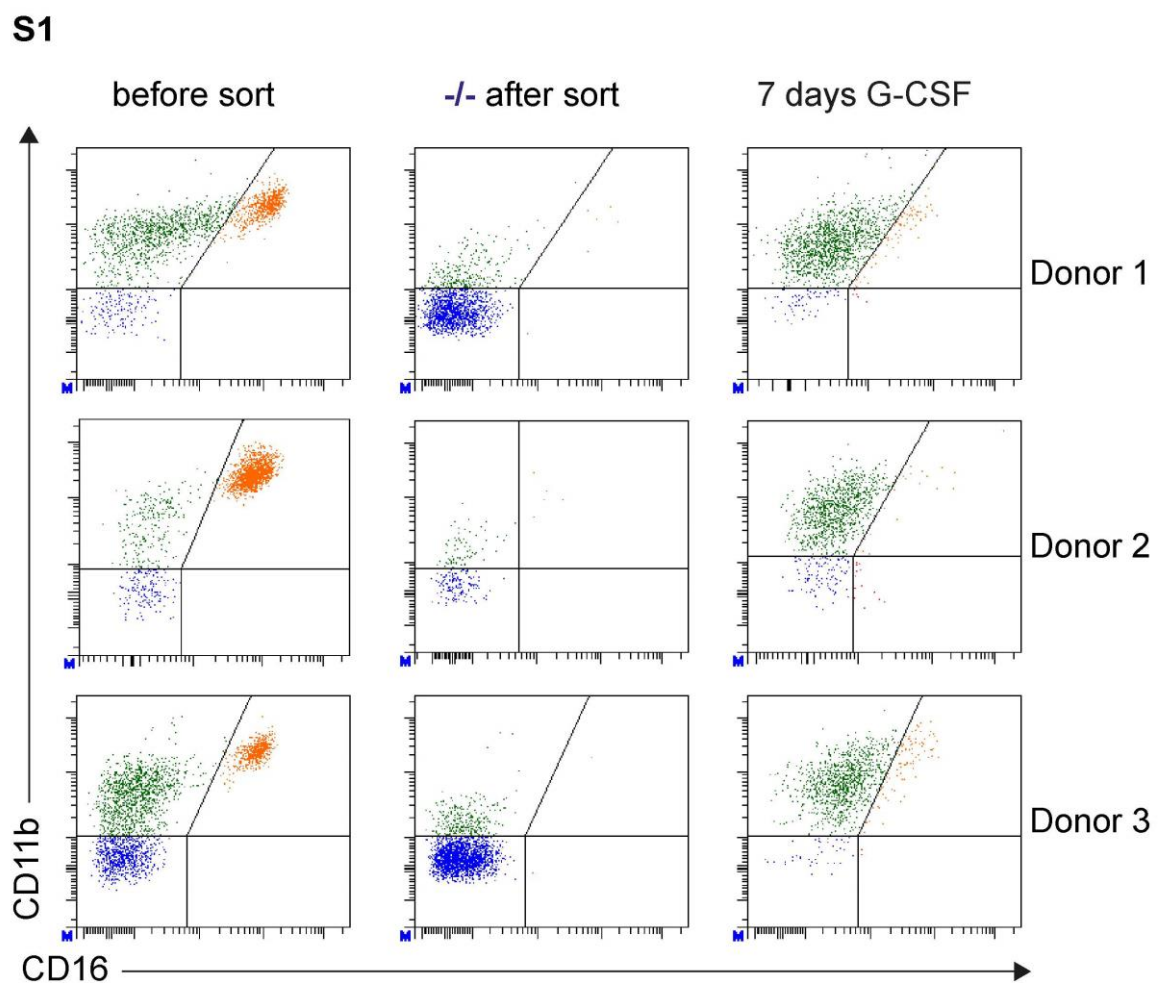

**Figure S1: In vitro differentiation of immature PMN-MDSC**

CD11b<sup>+</sup>/CD16<sup>+</sup> immature PMN-MDSC of three cancer patients (donor 1-3) were sorted as described in figure 4. Cells were cultured for 7 days in the presence of 40ng/mL G-CSF and stained for maturation markers CD11b and CD16. Flow cytometry dot plots of PMN-MDSC before sorting (left column), after sorting (middle column) and after 7 days of differentiation (right column) are shown. Note the increase in CD11b and CD16 expression during in vitro differentiation.

S2

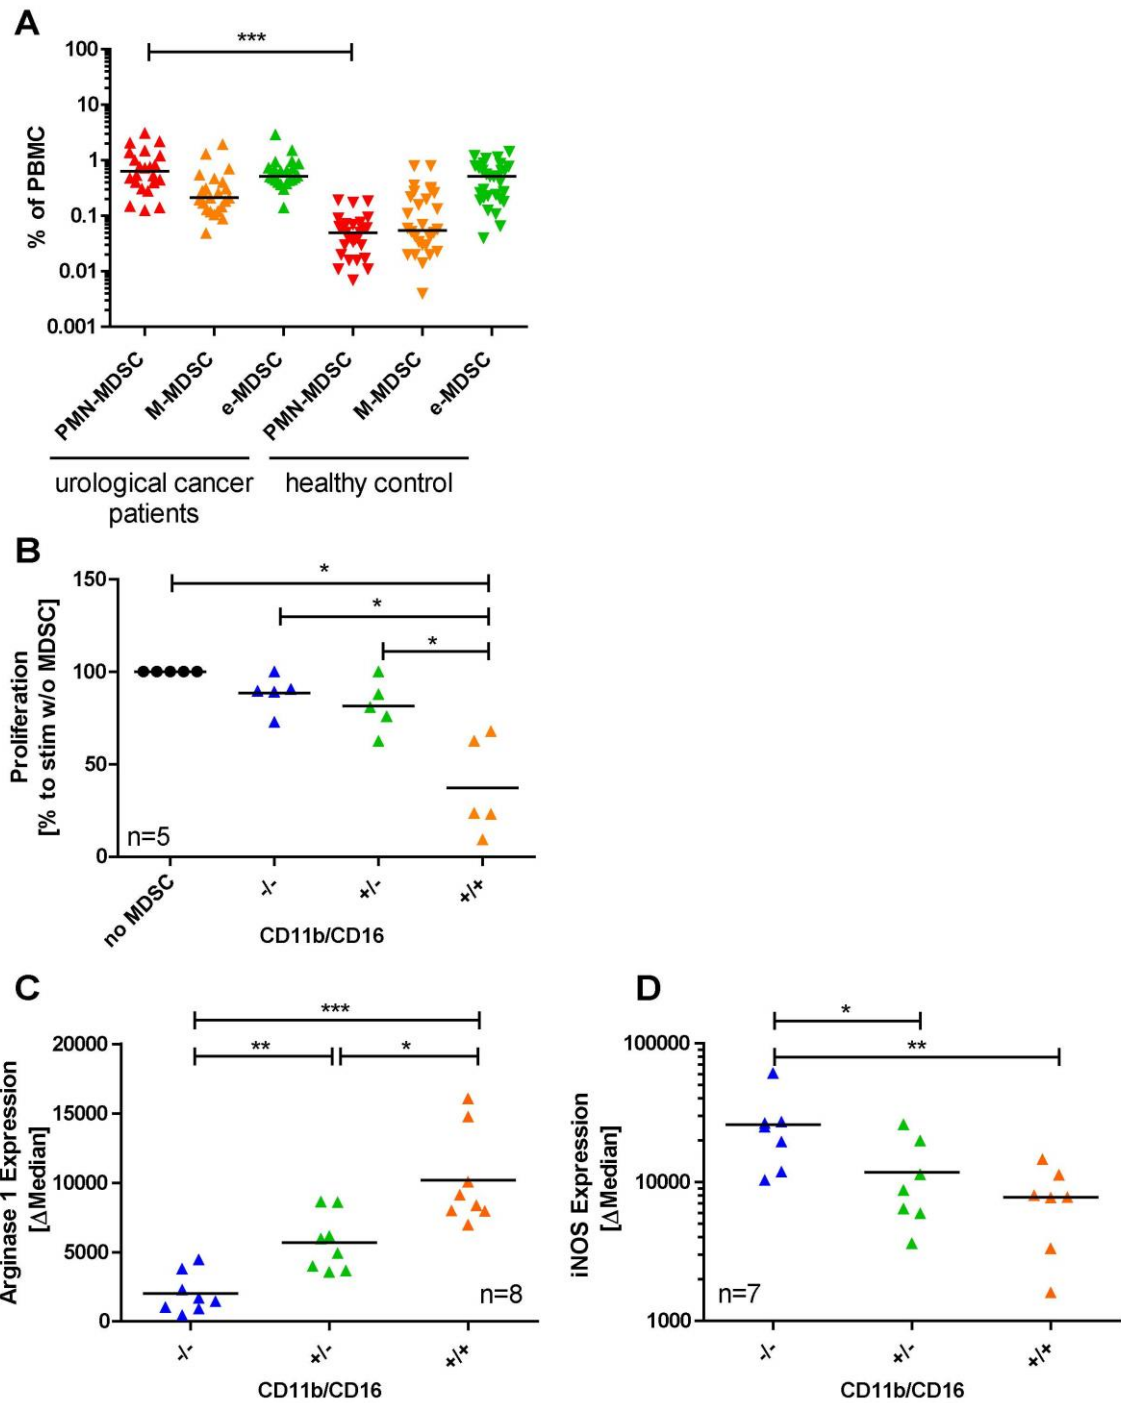

**Figure S2: MDSC in patients with urological cancers**

(A) MDSC subsets were identified and classified as described in Figure 1A in PBMC of 22 patients with urological cancers and 30 healthy donor controls. Kruskal-Wallis and Dunn's multiple comparison test were used for statistical analysis. Results were considered significant at \* $p \leq 0.05$ , \*\*  $p \leq 0.005$  and \*\*\*  $p \leq 0.0005$ . (B) Mature and immature PMN-MDSC subsets were sorted from PBMC of urological cancer patients as described in Figure 4. Suppression assay was performed with autologous CD3<sup>+</sup> responder T cells stimulated with plate-coated CD3 and CD28 mAb in the presence of PMN-MDSC subsets (T cell

: MDSC ratio of 2.5:1). Lymphocyte proliferation was measured at day 4. Relative proliferation to stimulated T cell without PMN-MDSC of individual donors is shown. Expression of arginase 1 (C) and iNOS (D) was determined by intracellular FACS staining.  $\Delta$  Median expression (difference to isotype control) is shown. Wilcoxon signed rank test was used for statistical analysis. Results were considered significant at \* $p \leq 0.05$ , \*\*  $p \leq 0.005$  and \*\*\*  $p \leq 0.0005$
